# Supplementary material for: Integrative analysis of genomic sequencing data reveals higher prevalence of LRP1B mutations in lung adenocarcinoma patients with COPD
Source: PubMed Central journal article supplement (PMC5437030; doi:10.1038/s41598-017-02405-9), 2017-05-18
Supplement: 41598_2017_2405_MOESM1_ESM.pdf [file 41598_2017_2405_MOESM1_ESM.pdf]

Integrative Analysis of genomic sequencing data reveals higher prevalence of LRP1B mutations in lung adenocarcinoma patients with COPD

Dakai Xiao<sup>1,2,3#</sup>, Fuqiang Li<sup>4,5#</sup>, Hui Pan<sup>1,2</sup>, Han Liang<sup>4,5</sup>, Kui Wu<sup>\*4,5,6</sup>, Jianxing He<sup>\*1,2,3</sup>

1. Department of Thoracic Surgery, The First Affiliated Hospital of Guangzhou Medical University, Guangzhou 510120, China
2. Research Center for Translational Medicine, The First Affiliated Hospital of Guangzhou Medical University, Guangzhou 510120, China
3. Guangzhou Institute of Respiratory Disease & State Key Laboratory for Respiratory Disease, Guangzhou 510120, China
4. Cancer Institute, BGI-Research, BGI-Shenzhen, Shenzhen 518083, China
5. China National GeneBank-Shenzhen, BGI-Shenzhen, 518120, China
6. Department of Biology, University of Copenhagen, DK-2200, Copenhagen N, Denmark

#These authors contributed equally to this work

Corresponding authors:

Jianxing He, M.D, Ph.D

Department of Thoracic Surgery

The First Affiliated Hospital of Guangzhou Medical University

E-mail: [Drjianxing.he@gmail.com](mailto:Drjianxing.he@gmail.com)

Kui Wu, Ph.D

BGI-Shenzhen

E-mail: [wukui@genomics.cn](mailto:wukui@genomics.cn)

## Supplementary Figure Legend

### Fig. S1:

Somatic mutations and their association with COPD in LUAD patients stratified by smoking status in GMU cohort. Mutated genes and mutant frequencies in the primary tumor with and without COPD from smokers (left panel) and non-smokers (right panel) were shown. Genders, smoking status, tumor stage, survival and mutation types were also listed at the bottom according to the samples

### Fig.S2

Recurrent Somatic mutations and their association with COPD in LUAD patients. Mutated genes and the mutant frequencies in the primary tumors with or without COPD from TCGA cohort were shown. Genders, smoking status, tumor stage, survival and mutation types were listed at the bottom according to the samples.

Fig.S1

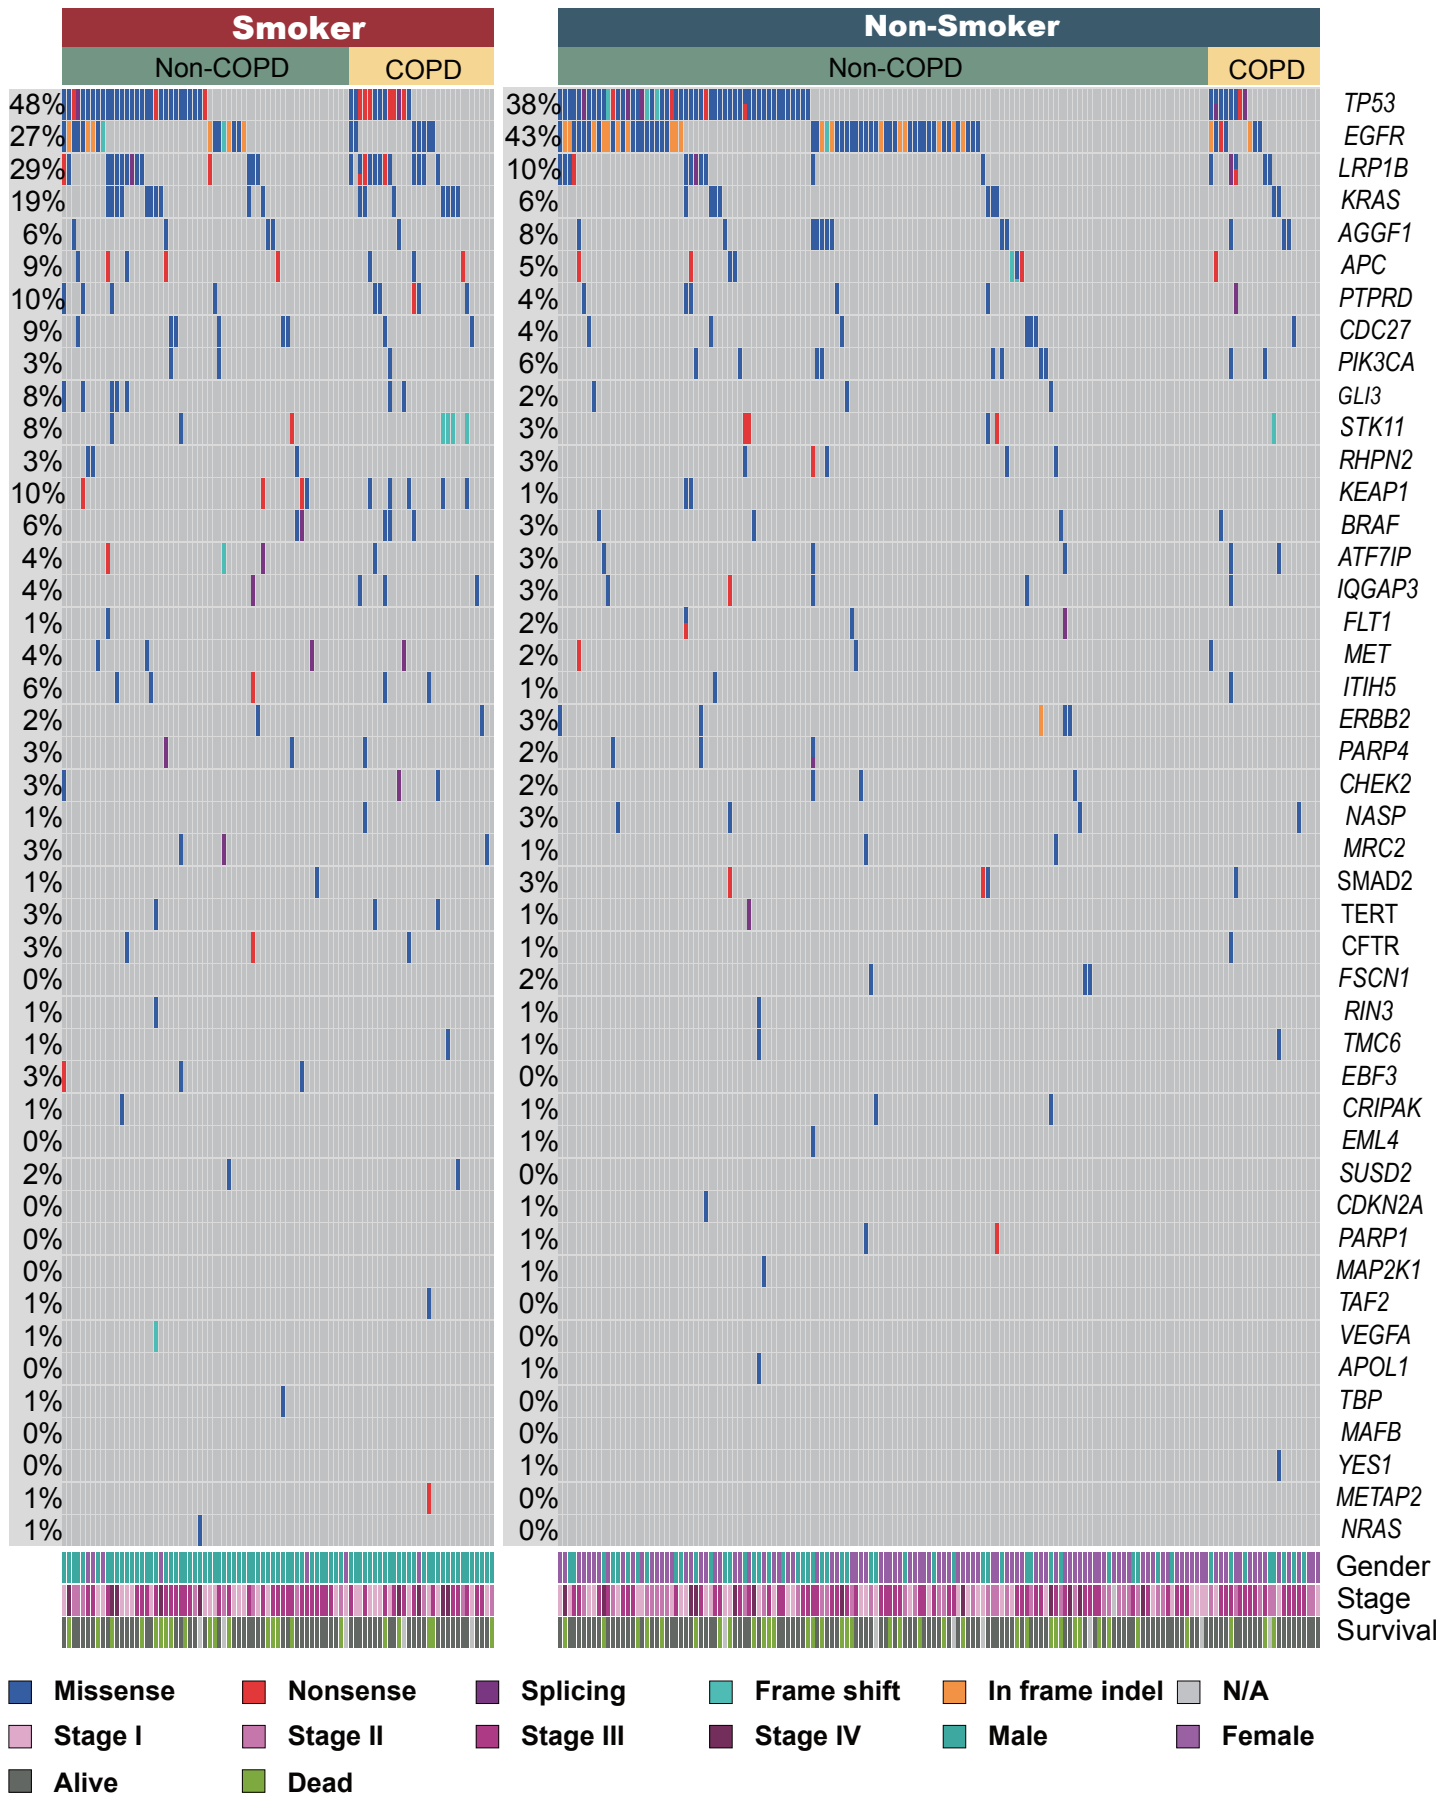

Fig.S2

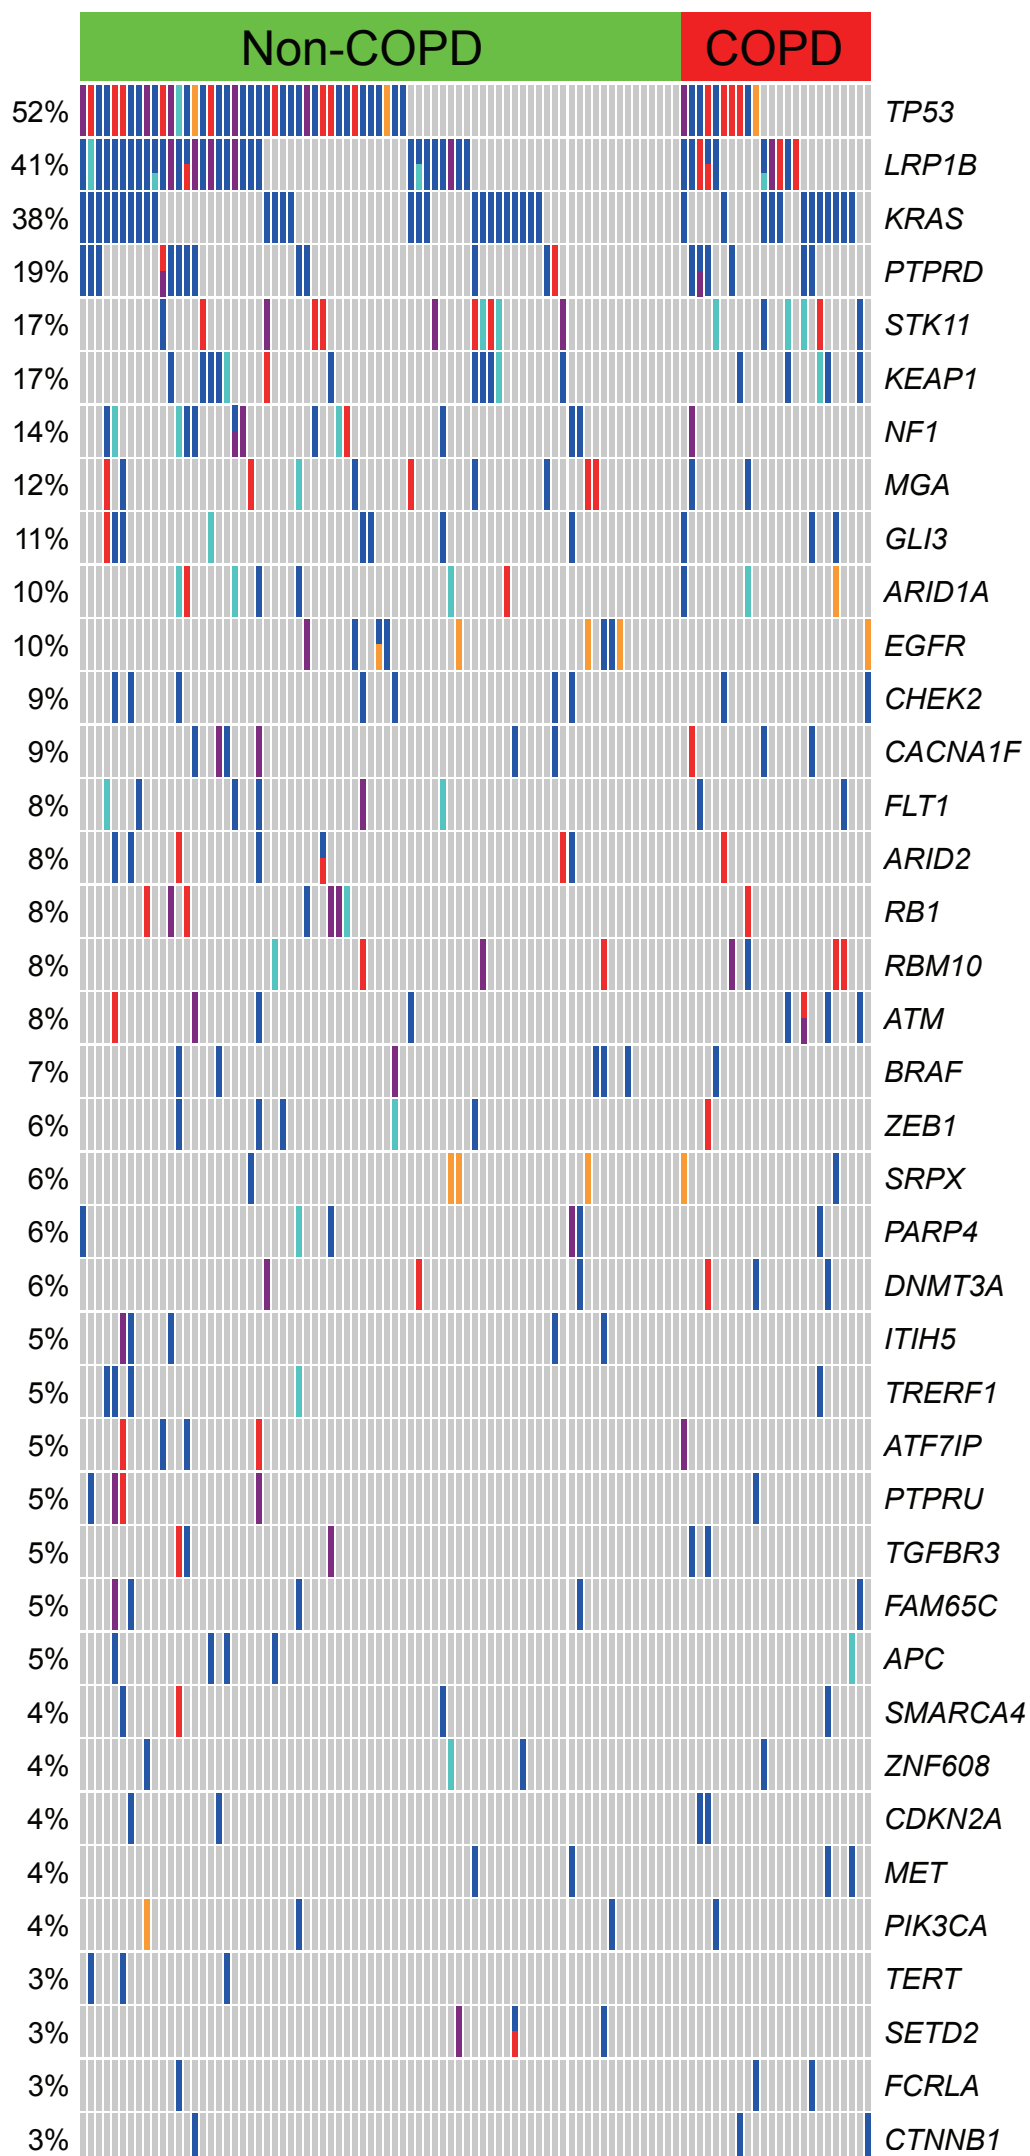

Fig. S2  
(Continued)

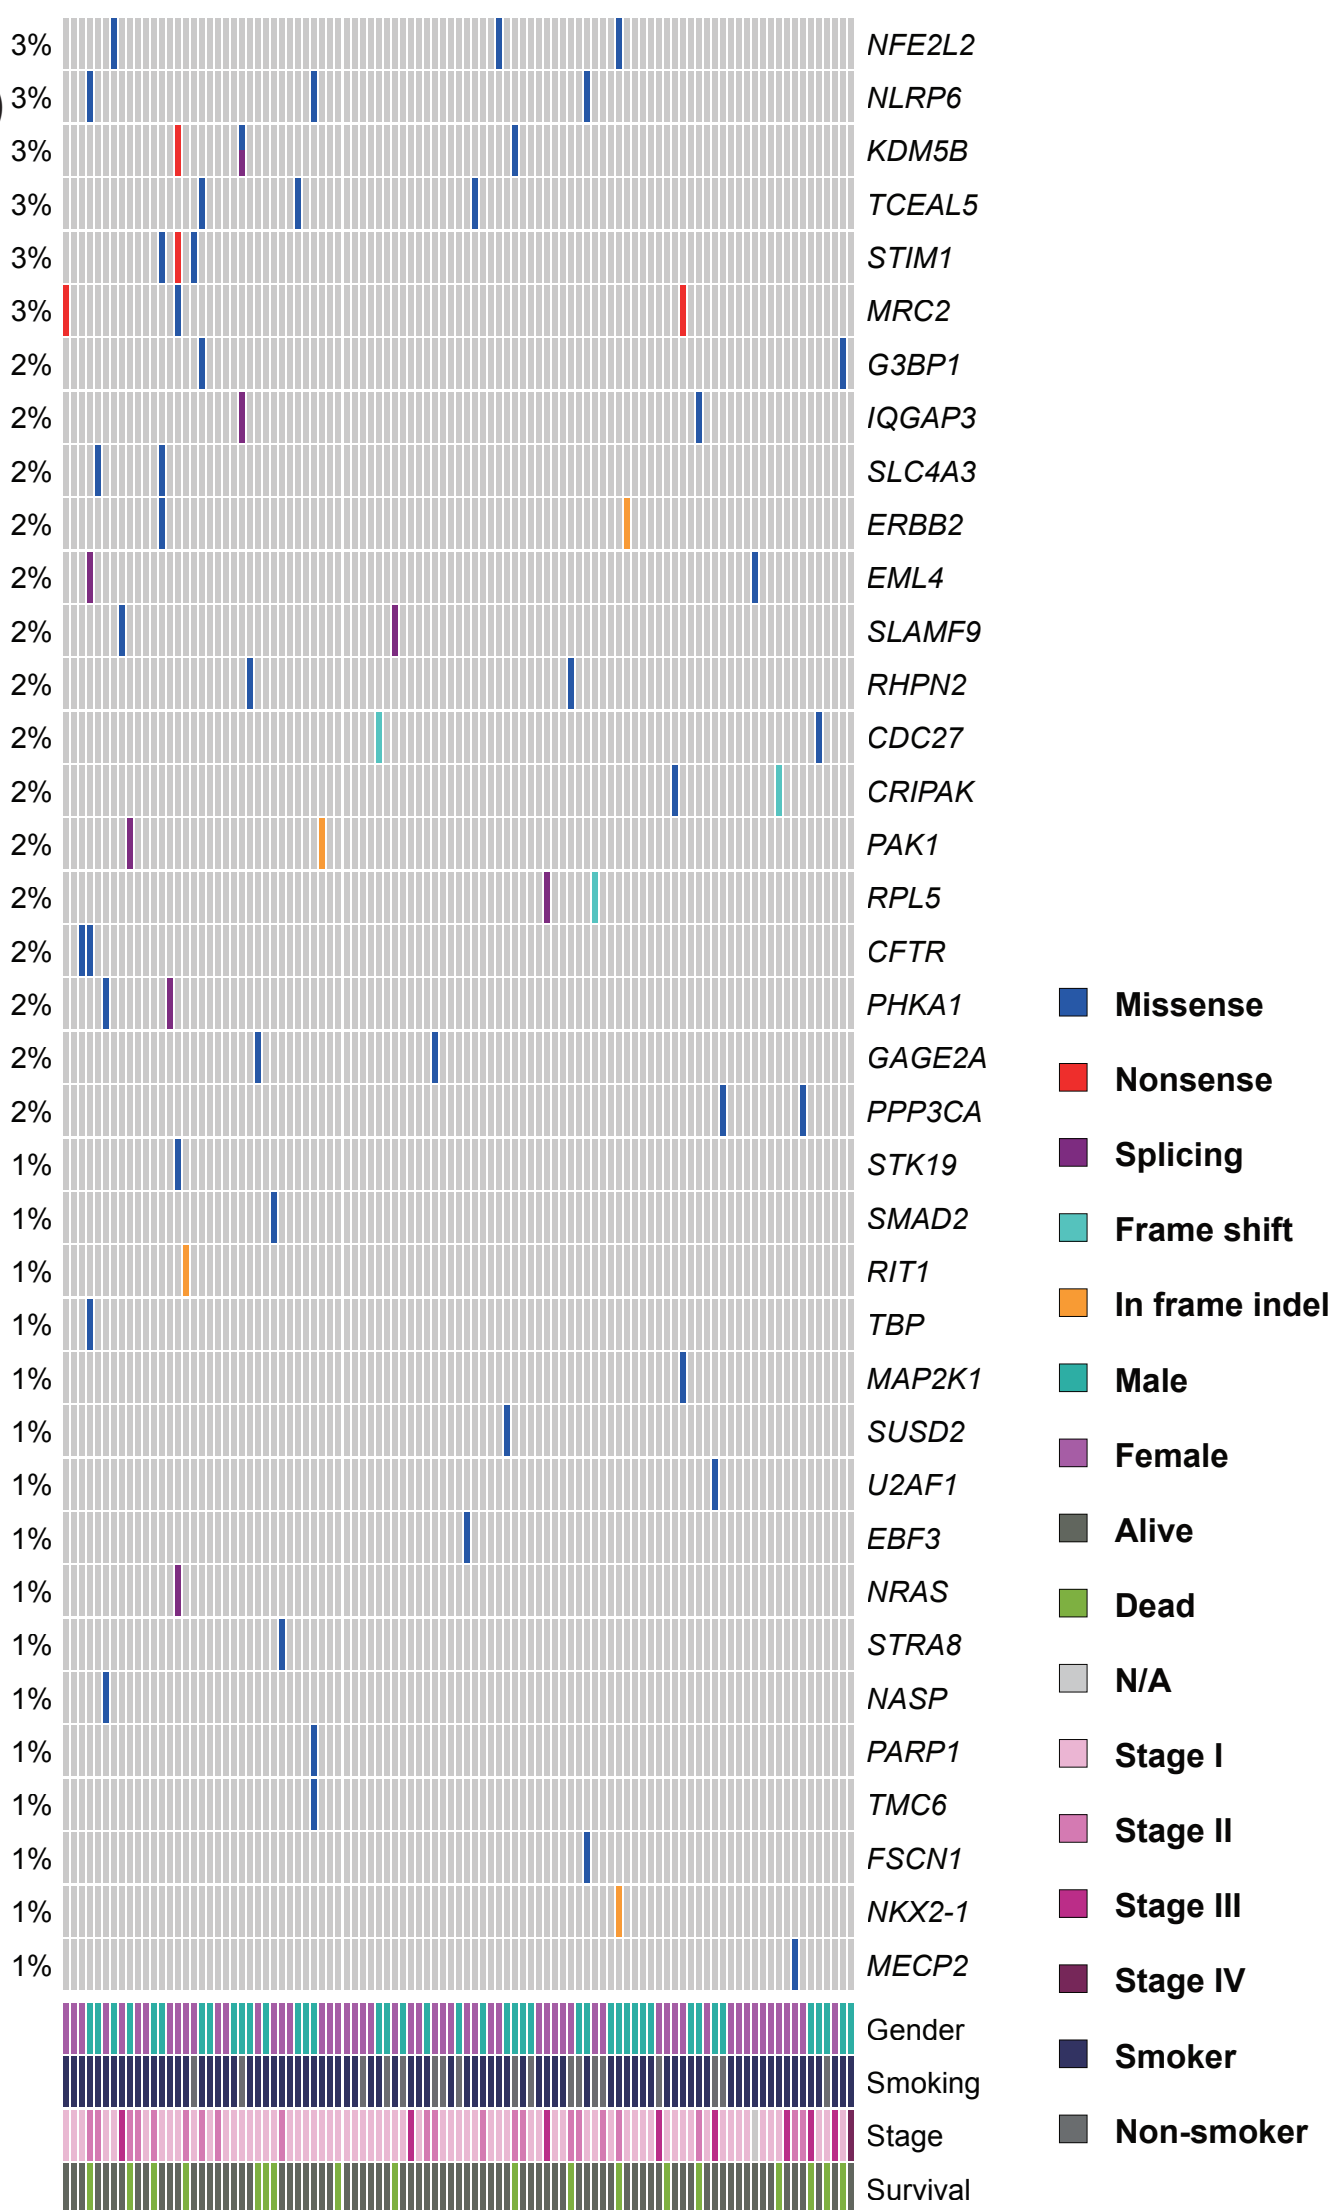

Supplementary Tables

Table S1

Univariate analysis with negative binomial regression comparing the counts of nonsense mutation and mutation in splicing site between COPD and non-COPD groups

|      | No.of patients | No.of Nonsense mutation<br>median(range) | <i>p</i> value | No. of mutation in splicing site<br>median(range) | <i>p</i> value |
|------|----------------|------------------------------------------|----------------|---------------------------------------------------|----------------|
| COPD |                |                                          | <b>0.0358</b>  |                                                   | <b>0.0371</b>  |
| Yes  | 18             | 8(0-62)                                  |                | 2.5(0-28)                                         |                |
| No   | 67             | 4(0-65)                                  |                | 2(0-31)                                           |                |

Table S2

Demographic and clinical information of LUAD patients from TCGA cohort

| Variable     | Overall<br>(n=99) | COPD<br>(n=24) | Non-COPD<br>(n=75) | P-value |
|--------------|-------------------|----------------|--------------------|---------|
| Age, mean±SD | 66.66±9.49        | 68.83          | 65.96              | 0.134   |
| Gender       |                   |                |                    | 0.75    |
| Male         | 42                | 9              | 33                 |         |
| Female       | 57                | 15             | 42                 |         |
| Smoking      |                   |                |                    | 1       |
| No           | 14                | 3              | 11                 |         |
| Yes          | 85                | 21             | 64                 |         |
| FEV1/FVC     | 80.24±21.62       | 53.13          | 88.92              | <0.0001 |
| Stage        |                   |                |                    | 0.057   |
| I            | 68                | 15             | 53                 |         |
| II           | 21                | 3              | 18                 |         |
| III          | 8                 | 4              | 4                  |         |
| IV           | 1                 | 1              | 0                  |         |
| NA           | 1                 |                |                    |         |

Table S3

Univariate analysis with negative binomial regression comparing the counts of missense mutation between COPD and non-COPD groups in TCGA cohort

| Variable  | No. of patients<br>(n=99) | No. missense mutations<br>median(range) | Univariate<br>analysis | Multivariate<br>analysis |
|-----------|---------------------------|-----------------------------------------|------------------------|--------------------------|
|           |                           |                                         | p value                | p value                  |
| Age, year |                           |                                         | 0.000649               | 0.0012                   |
| ≤65       | 42                        | 242.5(2-3738)                           |                        |                          |
| >65       | 57                        | 135(10-1073)                            |                        |                          |
| Gender    |                           |                                         | 0.254                  | 0.4516                   |
| Male      | 42                        | 195(10-3738)                            |                        |                          |
| Female    | 57                        | 203 (2-1819)                            |                        |                          |
| Smoking   |                           |                                         | 0.0169                 | 0.0121                   |
| Yes       | 85                        | 215(10-3738)                            |                        |                          |
| No        | 9                         | 191(45-240)                             |                        |                          |
| NA        | 5                         | -                                       |                        |                          |
| Stage     |                           |                                         |                        |                          |
| I         | 68                        | 206(10-3738)                            | (reference)            | (reference)              |
| II        | 21                        | 247(15-1819)                            | 0.328                  | 0.6198                   |
| III       | 8                         | 124.5(2-334)                            | 0.036                  | 0.4821                   |
| IV        | 1                         | 51                                      | 0.074                  | 0.0922                   |
| NA        | 1                         | -                                       |                        |                          |
| COPD      |                           |                                         | 0.133                  | 0.7166                   |
| Yes       | 24                        | 195(51-903)                             |                        |                          |
| No        | 75                        | 203(2-3738)                             |                        |                          |



Table S4

Univariable analysis of factors associated with overall survival of LUAD patients

| Variable                       | HR,95%CI         | P-value       |
|--------------------------------|------------------|---------------|
| Age(year),≤65 vs >65           | 0.70(0.43-1.15)  | 0.158         |
| Gender,male vs female          | 1.80(1.17-2.78)  | <b>0.0078</b> |
| Smoking,yes vs no              | 0.97(0.61-1.56)  | 0.911         |
| COPD,yes vs no                 | 1.02(0.59-1.78)  | 0.946         |
| Stage( I vs II vs III vs IV)   | -                | <b>0.0014</b> |
| WBC,elevated vs normal         | 1.25(0.78-2.00)  | 0.356         |
| Neutrophil, elevated vs normal | 4.57(0.75-27.78) | 0.099         |
| Eosnophil, elevated vs normal  | 1.55(0.89-2.69)  | 0.122         |
| Basophil, elevated vs normal   | 0.36(0.03-4.64)  | 0.434         |
| Monocyte, elevated vs normal   | 0.60(0.22-1.69)  | 0.335         |
| Lymphocyte, elevated vs normal | 0.76(0.14-4.16)  | 0.75          |
| LMR, High vs Low               | 0.57(0.36-0.91)  | <b>0.018</b>  |
| CEA, elevated vs normal        | 1.01(0.65-1.56)  | 0.975         |
| CA125, elevated vs normal      | 2.16(1.07-4.34)  | <b>0.031</b>  |
| CA153, elevated vs normal      | 3.45(1.72-6.90)  | 0.00047       |
